# Supplementary material for: Anticancer activity in human multiple myeloma U266 cells: synergy between cryptotanshinone and arsenic trioxide
Source: Royal Society of Chemistry journal article supplement (doi:10.1039/c3mt20272k), 2013-01-01

## Electronic Supplementary Information (ESI)

### Anticancer activity in human multiple myeloma U266 cells: synergy between cryptotanshinone and arsenic trioxide

Pei Liu<sup>1</sup>, Shi Xu<sup>2</sup>, Min Zhang<sup>2,3</sup>, Wen Wen Wang<sup>2,3</sup>, Yan Fang Zhang<sup>2</sup>,  
Kanwal Rehman<sup>2</sup>, Hua Naranmandura<sup>2\*</sup>, Zhe Chen<sup>1\*</sup>

**S-Fig.1. Effect of arsenic, cryptotanshinone (CPT) or combination of iAs<sup>III</sup> and CPT on the viability of human multiple myeloma RPMI 8266 cells.** Briefly, RPMI 8266 cells were seeded at a density of  $2 \times 10^4$  cells per well in triplicate in 96-well plates. The cells were exposed to indicate concentrations of iAs<sup>III</sup> (A), cryptotanshinone (B) or combination of  $1 \mu\text{M}$  iAs<sup>III</sup> and  $15 \mu\text{M}$  CPT (C) for 24 h. Cell viability was determined by MTT assay as described. Data are expressed as mean values  $\pm$  S.D.

S-Fig.1.

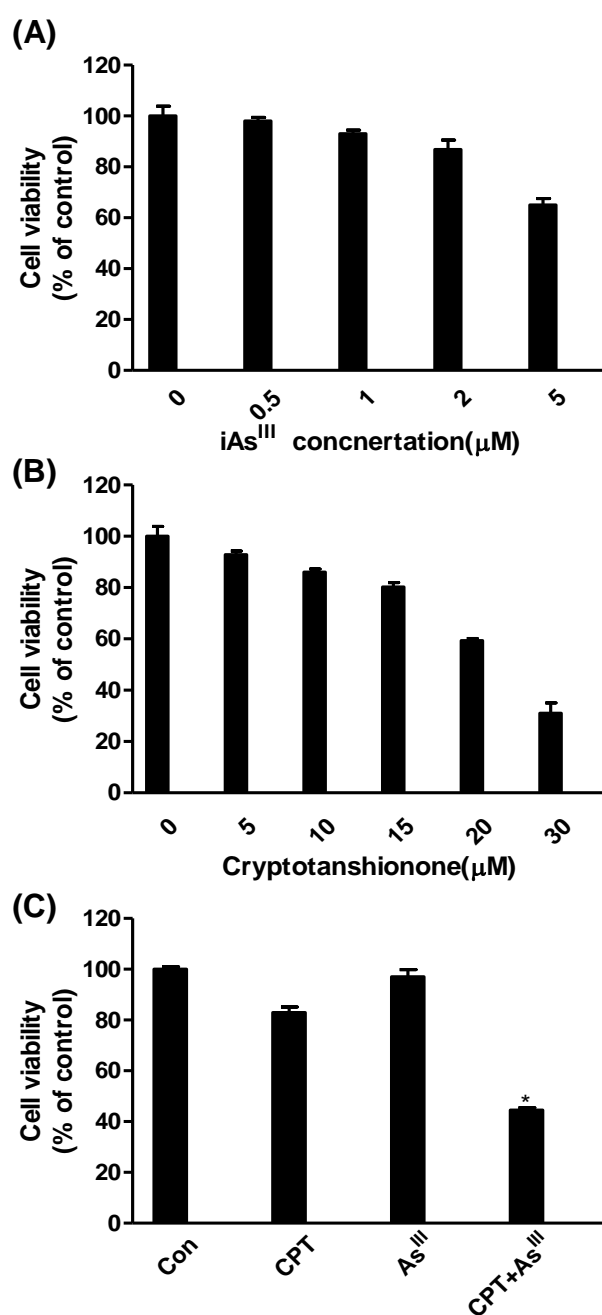

Supplement: c3mt20272k.pdf [file c3mt20272k.pdf]
